# Supplementary material
Source: PubMed Central journal article supplement (PMC7446124)
Supplement: NIHMS1620185-supplement-Supplementary_legend.pdf [file NIHMS1620185-supplement-Supplementary_legend.pdf]

## **Supplemental legends**

### **Supplemental Table 1. Patients' characteristics**

M ± SD: mean ± standard deviation

Min-Max: minimum-maximum

Med [IQR]: median [interquartile range]

### **Supplemental Table 2. Comparison of characteristics of patients that have attended visit 3, and those that haven't.**

BDI Beck Depression Inventory, SF-36 Short-Form 36, PCQ Psychological Consequences of Screening

\* higher score, higher anxiety level

\*\* higher score, higher mood disorder level

\*\*\* higher score, better quality of life

\*\*\*\* higher score, higher negative psychological consequence

### **Supplemental Table 3. Correlations between the psychological status at visit 1 and visit 3.**

### **Supplemental figure 1. Flow chart.**
