# Supplementary material
Source: PubMed Central journal article supplement (PMC7446124)
Supplement: NIHMS1620185-supplement-Supplementary_table.pdf [file NIHMS1620185-supplement-Supplementary_table.pdf]

## Supplemental Tables

**Supplemental Table 1.**

|                     |                         | <b>N=24</b>     |
|---------------------|-------------------------|-----------------|
| Gender              | Women                   | 10 (41%)        |
| Age                 | M $\pm$ SD              | 55,5 $\pm$ 14,4 |
|                     | Min-Max                 | from 32 to 79   |
| Marital status      | Couple                  | 17 (81%)        |
|                     | Single                  | 4 (19%)         |
| Children            | Without                 | 2 (9%)          |
|                     | With                    | 21 (91%)        |
| Educational level   | Low (<12 years)         | 8 (38%)         |
|                     |                         | 13 (62%)        |
|                     | High ( $\geq$ 12 years) |                 |
| Professional status | Working                 | 11 (46%)        |
|                     | Non-working             | 13 (54%)        |

M  $\pm$  SD: mean  $\pm$  standard deviation

Min-Max: minimum-maximum

Med [IQR]: median [interquartile range]

**Supplemental Table 2.**

|                                             |                        | <b>Patients attending visit 3<br/>N=12</b> | <b>Patients lost to follow-up at visit 3<br/>N=9</b> | <b>p-value</b> |
|---------------------------------------------|------------------------|--------------------------------------------|------------------------------------------------------|----------------|
|                                             |                        | <b>N</b>                                   | <b>N</b>                                             |                |
|                                             |                        | <b>M ± SD</b>                              | <b>M ± SD</b>                                        |                |
|                                             |                        | <b>Med [IQR]</b>                           | <b>Med [IQR]</b>                                     |                |
| Gender                                      | Women                  | 5                                          | 5                                                    | 0.670          |
| Age                                         |                        | 45.6 ± 11.7                                | 66.1 ± 8.6                                           | 0.001          |
| Marital status                              | Couple                 | 1                                          | 3                                                    | 0.272          |
|                                             | Single                 | 11                                         | 6                                                    |                |
| Children                                    | Without                | 1                                          | 1                                                    | 1.00           |
|                                             | With                   | 10                                         | 8                                                    |                |
| Educational level                           | Low (<12 years)        | 4                                          | 4                                                    | 0.673          |
|                                             | High (>= 12 years)     | 8                                          | 5                                                    |                |
| Professional status                         | Working                | 9                                          | 1                                                    | 0.008          |
|                                             | Non-working            | 3                                          | 8                                                    |                |
| Anxiety (Spielberger)                       | Trait (20-80)*         | 33.0 [25.3-40.5]                           | 42.0 [32.6-62.9]                                     | 0.129          |
|                                             | State (20-80)*         | 42.5 [31.9-47.0]                           | 47.4 [34.6-54.0]                                     | 0.345          |
| Mood disorders (BDI)                        | Total score (0-39)**   | 4.5 [1.3-6.0]                              | 2.0 [0-8.5]                                          | 0.886          |
|                                             | No                     | 5                                          | 5                                                    | 0.670          |
|                                             | Mild-moderate          | 7                                          | 4                                                    |                |
| Quality of life (SF-36)                     | Mental score***        | 43.6 [30.8-52.9]                           | 36.0 [33.5-56.2]                                     | 0.967          |
|                                             | Physical score***      | 47.8 [38.6-51.9]                           | 53.0 [43.2-56.8]                                     | 0.167          |
| Psychological consequences of testing (PCQ) | Total score (0-10)**** | 4.6 [3.6-5.4]                              | 5.5 [2.7-7.1]                                        | 0.602          |

**Supplemental Table 3.**

|                                   |       | Visit 3 |        |               |        |         |        |        |         |         |        |         |         |        |        |
|-----------------------------------|-------|---------|--------|---------------|--------|---------|--------|--------|---------|---------|--------|---------|---------|--------|--------|
| Visit 1                           |       | Anxiety |        | Mood disorder | QoL    |         |        |        |         |         |        |         |         |        | Ps     |
|                                   |       | Trait   | State  | BDI           | PF     | SF      | RP     | RE     | MH      | Vi      | BP     | GH      | MCS     | PCS    | PCQ    |
| <b>Anxiety</b>                    | Trait | 0.57    | .639*  | 0.299         | -0.156 | -.774** | 0.053  | -0.138 | -.689*  | -.586*  | -0.191 | -.616*  | -.616*  | 0.07   | 0.351  |
|                                   | State | 0.481   | .898** | 0.446         | 0.092  | -.735** | 0.066  | -0.053 | -.770** | -.583*  | -0.322 | -0.547  | -.683*  | 0.123  | 0.422  |
| <b>Mood disorder</b>              | BDI   | 0.491   | .700*  | 0.47          | -0.219 | -.754** | -0.45  | -0.463 | -.670*  | -.641*  | -0.481 | -.746** | -.722** | -0.414 | 0.417  |
| <b>QoL</b>                        | PF    | -0.523  | -0.415 | -.615*        | .804** | 0.384   | .710** | .822** | 0.533   | .717**  | 0.021  | 0.553   | .658*   | 0.556  | -.647* |
|                                   | SF    | -0.179  | -0.351 | -0.078        | 0.082  | 0.337   | 0.142  | 0.276  | 0.29    | 0.444   | 0.159  | 0.517   | 0.343   | 0.102  | 0.106  |
|                                   | RP    | -0.516  | -0.148 | -0.378        | .579*  | 0.369   | .647*  | .721** | 0.252   | 0.465   | 0.069  | .591*   | 0.462   | 0.567  | -0.346 |
|                                   | RE    | -0.261  | -0.357 | -0.205        | 0.241  | 0.475   | 0.529  | 0.523  | 0.413   | 0.425   | 0.238  | .593*   | 0.507   | 0.457  | -0.134 |
|                                   | MH    | -0.253  | -.600* | -0.445        | 0.082  | 0.333   | -0.002 | 0.159  | .647*   | 0.405   | -0.071 | 0.189   | 0.555   | -0.194 | -0.239 |
|                                   | Vi    | -0.433  | -0.534 | -0.538        | .680*  | .631*   | 0.55   | .724** | .660*   | .894**  | 0.312  | .784**  | .780**  | 0.511  | -0.416 |
|                                   | BP    | -.629*  | -0.531 | -0.537        | 0.335  | .678*   | 0.3    | 0.318  | .577*   | .591*   | 0.222  | .656*   | .607*   | 0.277  | -.678* |
|                                   | GH    | -0.562  | -0.288 | -0.099        | 0.285  | .668*   | 0.134  | 0.299  | 0.359   | 0.511   | 0.191  | .754**  | 0.442   | 0.228  | -0.183 |
|                                   | MCS   | -0.326  | -.620* | -0.343        | 0.113  | 0.49    | 0.124  | 0.296  | .635*   | 0.527   | 0.071  | 0.477   | .615*   | -0.007 | -0.144 |
|                                   | PCS   | -.669*  | -0.203 | -0.445        | 0.546  | 0.472   | 0.504  | 0.56   | 0.323   | 0.478   | 0.004  | .640*   | 0.49    | 0.483  | -0.558 |
| <b>Psychological consequences</b> | PCQ   | 0.32    | .712** | 0.443         | -0.374 | -0.555  | -0.389 | -.578* | -.687*  | -.785** | -0.321 | -.647*  | -.740** | -0.298 | 0.222  |
