# Supplementary material
Source: PubMed Central journal article supplement (PMC7446124)

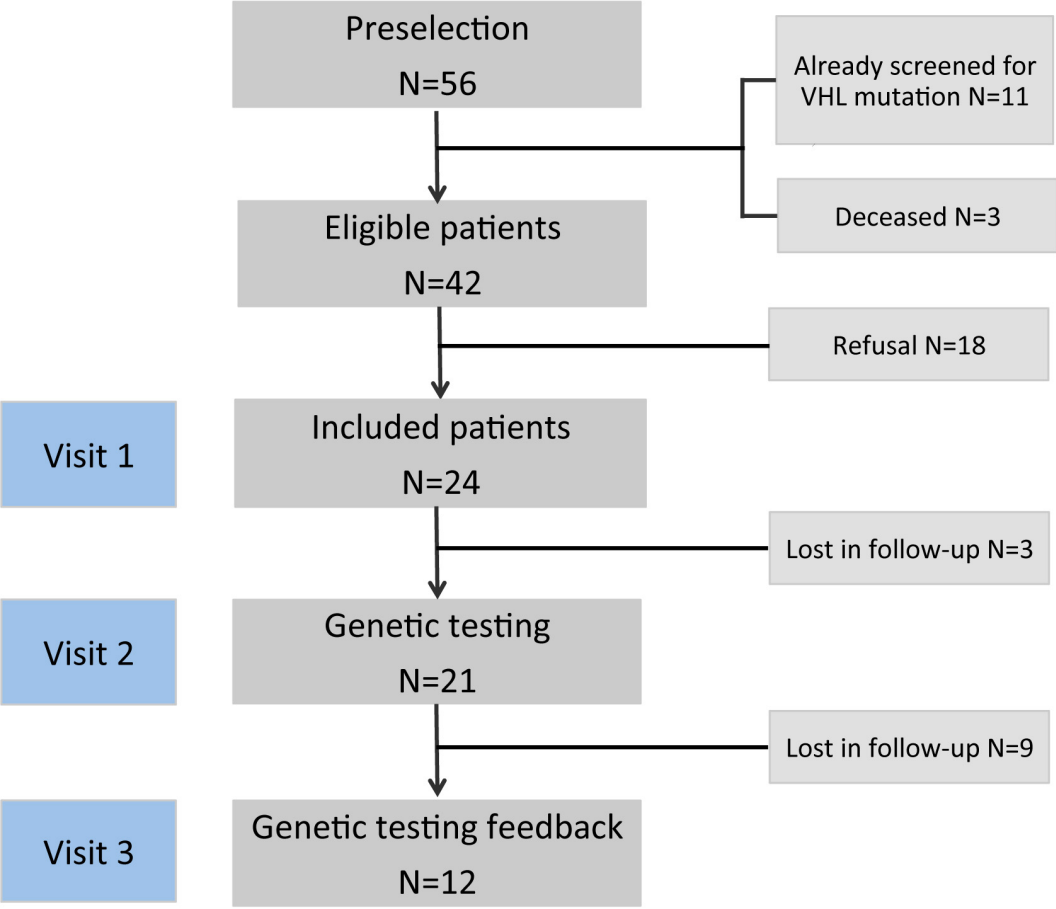

Supplement: NIHMS1620185-supplement-Supplementary_figure.pdf [file NIHMS1620185-supplement-Supplementary_figure.pdf]
